# Supplementary material
Source: PubMed Central journal article supplement (PMC8033461)

## Supplemental Material

### **Complement Promotes Endothelial von Willebrand Factor and Angiopoietin-2 Release in Obstructive Sleep Apnea: von Willebrand Factor and Angiopoietin-2 Release in Sleep Apnea**

Su Gao<sup>1†</sup>, Memet Emin<sup>1†</sup>, Theodosia Thoma<sup>1</sup>, Kalliopi Pastellas<sup>1</sup>, Francesco Castagna<sup>1</sup>, Riddhi Shah<sup>1</sup>, Alondra Jimenez<sup>1</sup>, Neha Patel<sup>1</sup>, Ying Wei<sup>2</sup>, Sanja Jelic<sup>1\*</sup>

<sup>1</sup> Division of Pulmonary, Allergy, and Critical Care Medicine and <sup>2</sup> Division of Biostatistics, Columbia University College of Physicians and Surgeons, New York, NY, 10032

† Equal first author

\* Address for correspondence:

Sanja Jelic, M.D.

Columbia University College of Physicians and Surgeons

Division of Pulmonary, Allergy, and Critical Care Medicine

630 West 168th Street, PH8 Center, Room 101

New York, NY 10032

Email: [sj366@cumc.columbia.edu](mailto:sj366@cumc.columbia.edu)

## **Assessment of plasma vWF multimer levels**

Analysis of von Willebrand Factor multimeric patterns in human plasma was performed in a commercial laboratory (ARUP) <sup>1,2</sup>. Sodium citrate plasma was treated with an anionic detergent to convert the proteins to anionic detergent-protein complexes. In these complexes, the native conformation of proteins is disrupted and they all assume the same conformation and the same negative charge per mass unit. These complexes are applied to a concentrated agarose gel where electrophoresis separates the complexes according to their molecular weight. The vWF multimers with molecular weight between 500 and 20,000 kDa are separated and immunoprecipitated with a specific anti-von Willebrand factor antiserum. The different bands are then visualized with a peroxidase-labeled antibody and a specific substrate.

### **Supplemental references:**

1. Flood VH, Christopherson PA, Gill JC, Friedman KD, Haberichter SL, Bellissimo DB, Udani RA, Dasgupta M, Hoffmann RG, Ragni MV, Shapiro AD, Lusher JM, Lentz SR, Abshire TC, Leissinger C, Hoots WK, Manco-Johnson MJ, Gruppo RA, Boggio LN, Montgomery KT, Goodeve AC, James PD, Lillicrap D, Peake IR and Montgomery RR. Clinical and laboratory variability in a cohort of patients diagnosed with type 1 VWD in the United States. *Blood*. 2016;127:2481-2488.
2. Jacobi PM, Gill JC, Flood VH, Jakab DA, Friedman KD and Haberichter SL. Intersection of mechanisms of type 2A VWD through defects in VWF multimerization, secretion, ADAMTS-13 susceptibility, and regulated storage. *Blood*. 2012;119:4543-4553.

**Table S1. Characteristics of the Participants.**

|                                                     | <b>OSA patients</b> | <b>Control subjects</b> | <b>p value</b> |
|-----------------------------------------------------|---------------------|-------------------------|----------------|
|                                                     | (n=109)             | (n=67)                  |                |
| Age (years)                                         | 44±13               | 38±13                   | 0.003          |
| Gender (% female)                                   | 53                  | 67                      | NS             |
| Body mass index (kg/m <sup>2</sup> )                | 37.4±10.2           | 32.15±9.7               | <0.001         |
| Apnea-hypopnea index (events/h of sleep)            | 24.7±26.4           | 1.53±1.50               | <0.001         |
| Systolic blood pressure (mmHg)                      | 127±16.1            | 121.7±13.7              | 0.03           |
| Diastolic blood pressure (mmHg)                     | 79±10.1             | 77.6±8.76               | NS             |
| Oxygen Desaturation Index (events/h of sleep)       | 16.7±25.3           | 0.61±1.03               | <0.001         |
| Epworth                                             | 10.13±5.76          | 7.85±4.71               | 0.008          |
| SaO <sub>2</sub> nadir %                            | 82.12±13.47         | 90.2±5.98               | <0.001         |
| t<SaO <sub>2</sub> 90% (% of the total sleep time)* | 4.0±12.35           | 0.14±0.41               | 0.003          |
| Hypertension, n (%)                                 | 30 (28)             | 9 (14)                  | NS             |

OSA= Obstructive Sleep Apnea

SaO<sub>2</sub>= Arterial Oxyhemoglobin Saturation

\*Time spent below SaO<sub>2</sub> of 90% during sleep

Data are presented as mean±SD and %

NS=not significant

**Table S2. Bivariate association with angiotensin-2.**

|        | <b>Estimate</b> | <b>Std. Error</b> | <b>t value</b> | <b>p-value</b> |
|--------|-----------------|-------------------|----------------|----------------|
| AHI    | 10.492          | 8.738             | 1.201          | 0.233          |
| Age    | 4.415           | 12.305            | 0.359          | 0.721          |
| Gender | 292.014         | 320.360           | 0.912          | 0.364          |
| BMI    | 25.689          | 14.100            | 1.822          | 0.072          |
| SBP    | -0.061          | 10.672            | -0.006         | 0.995          |
| DBP    | -19.427         | 17.707            | -1.097         | 0.276          |

AHI= Apnea-hypopnea index (events/h of sleep)

BMI= Body mass index (kg/m<sup>2</sup>)

SBP= Systolic blood pressure (mmHg)

DBP= Diastolic blood pressure (mmHg)

**Table S3. Correlation between intermediate molecular weight (IMW) von Willebrand factor multimer levels and apnea-hypopnea index ( $r^2 = 0.3115$ ) adjusted for gender and diastolic blood pressure.**

|             | <b>Estimate</b> | <b>Std. Error</b> | <b>t value</b> | <b>p-value</b> |
|-------------|-----------------|-------------------|----------------|----------------|
| (Intercept) | 15.3898         | 15.0010           | 1.0259         | 0.3124         |
| AHI         | 0.3015          | 0.1094            | 2.7566         | 0.0094         |
| Gender      | 10.2831         | 3.6273            | 2.8349         | 0.0078         |
| DBP         | 0.3974          | 0.1545            | 2.5715         | 0.0148         |

AHI= Apnea-hypopnea index (events/h of sleep)

DBP= Diastolic blood pressure (mmHg)

**Table S4. Correlation between low molecular weight (LMW) von Willebrand factor multimer levels and apnea-hypopnea index ( $r^2 = 0.3085$ ) adjusted for body mass index.**

|             | <b>Estimate</b> | <b>Std. Error</b> | <b>t value</b> | <b>p-value</b> |
|-------------|-----------------|-------------------|----------------|----------------|
| (Intercept) | 0.8932          | 7.0597            | 0.1265         | 0.9000         |
| AHI         | 0.3116          | 0.1422            | 2.1916         | 0.0347         |
| BMI         | 0.5470          | 0.1714            | 3.1908         | 0.0029         |

AHI= Apnea-hypopnea index (events/h of sleep)

BMI= Body mass index (kg/m<sup>2</sup>)

**Table S5. Correlations between low molecular weight (LMW) von Willebrand factor multimer levels and obstructive sleep apnea severity parameters.**

| Correlations                                     | Estimate coefficients | Std. Error | p-value | r <sup>2</sup> |
|--------------------------------------------------|-----------------------|------------|---------|----------------|
| Unadjusted AHI                                   | 0.3558                | 0.1577     | 0.0299  | 0.1183         |
| AHI after adjusting for BMI                      | 0.3116                | 0.1422     | 0.0347  | 0.3085         |
| Unadjusted ODI                                   | 0.7429                | 0.2673     | 0.0113  | 0.2683         |
| ODI after adjusting for BMI                      | 0.6259                | 0.2524     | 0.0222  | 0.4078         |
| Unadjusted t < SaO <sub>2</sub> 90%              | 8.407                 | 2.906      | 0.0071  | 0.2237         |
| t < SaO <sub>2</sub> 90% after adjusting for BMI | 6.5886                | 2.7506     | 0.0235  | 0.3729         |

AHI= Apnea-hypopnea index (events/h of sleep)

BMI= Body mass index (kg/m<sup>2</sup>)

ODI= Oxygen desaturation index (events/h of sleep)

t < SaO<sub>2</sub> 90%= Time spent below SaO<sub>2</sub> of 90% during sleep

**Table S6. Bivariate associations with CD59-vWF Duolink levels.**

|        | <b>Estimate</b> | <b>Std. Error</b> | <b>t value</b> | <b>p-value</b> |
|--------|-----------------|-------------------|----------------|----------------|
| AHI    | 0.083           | 0.109             | 0.764          | 0.452          |
| Age    | -0.040          | 0.128             | -0.311         | 0.758          |
| Gender | -0.485          | 3.162             | -0.153         | 0.879          |
| BMI    | 0.003           | 0.157             | 0.021          | 0.984          |
| SBP    | 0.145           | 0.112             | 1.294          | 0.208          |
| DBP    | 0.075           | 0.163             | 0.460          | 0.650          |

AHI= Apnea-hypopnea index (events/h of sleep)

BMI= Body mass index (kg/m<sup>2</sup>)

SBP= Systolic blood pressure (mmHg)

DBP= Diastolic blood pressure (mmHg)

vWF = von Willebrand factor



## Supplemental Figure Captions:

**Figure S1. Circulating LMW vWF multimer levels in OSA.** Quantitation of plasma LMW vWF multimers levels from OSA patients ( $n = 22$ : 45% female; age  $40 \pm 13$  years; BMI  $42 \pm 14$ ; AHI  $18 \pm 18$  events/h; ODI  $8.3 \pm 13$  events/h) and controls ( $n = 18$ : 83% female; age  $35 \pm 11$  years; BMI  $36 \pm 10$ ; AHI  $1.1 \pm 1.3$ ; ODI  $0.6 \pm 0.6$  events/h) expressed as band mean intensity (mean  $\pm$  SD, permutation test).

vWF = von Willebrand factor; OSA = Obstructive Sleep Apnea; LMW = Low Molecular Weight; AHI = Apnea–Hypopnea Index; ODI = Oxygen Desaturation Index; BMI = body mass index.

## **Figure S2. Expression of CD59 on the cell surface and MAC deposition on EC in**

**OSA.** (A) Representative confocal images and quantitation of the cell surface CD59 expression in ECs harvested from OSA patients ( $n = 40$ ) and controls ( $n = 19$ ). EC plasma membrane is identified by immunofluorescence for VE-cadherin. (B)

Representative confocal images and quantitation of MAC levels in ECs harvested from OSA patients ( $n = 40$ ) and controls ( $n = 19$ ). EC plasma membrane is identified by immunofluorescence for vascular endothelial (VE)-cadherin. All data throughout the figure are shown as the mean  $\pm$  SE, 2-sided t-test.

EC = Endothelial Cell; MAC = membrane attack complex; OSA = Obstructive Sleep Apnea; VE = vascular endothelial.

**Figure S3. IH effects on endothelial vWF and Ang-2 release in the absence of complement.** (A) Quantitation of vWF levels in HUVECs complement-free culture media in normoxia and IH ( $n = 5$ ) (ng/ml). (B) Quantitation of vWF expression on the cell surface in HUVECs cultured in complement-free media in normoxia and IH expressed as mean fluorescence intensity ( $n = 6$ ). (C) Representative confocal images and quantitation of intracellular vWF protein expression in HUVECs cultured in complement-free media in normoxia and IH ( $n = 4$ ). EC plasma membrane is identified by immunofluorescence for VE-cadherin. (D) Quantitation of mRNA levels in HUVECs cultured in complement-free media in normoxia and IH ( $n = 6$ ). All data throughout the figure are shown as the mean  $\pm$  SE, 2-sided t-test.

IH = Intermittent Hypoxia; vWF = von Willebrand factor; HUVECs = Human Umbilical Vein Endothelial Cells; DMSO = Dimethyl sulfoxide; VE = Vascular Endothelial.

**Figure S4. Confirmation of HUVEC transfection with CD59 siRNA.** Western blot probed with antibodies directed against CD59 and GAPDH. Transfection of HUVECs was carried out for 48 h using transfection reagent (Vehicle) and pooled siRNAs against CD59 [CD59 (966) siRNA to knock down CD59. A scrambled RNA (control RNA) served as a negative control. The expression of CD59 was almost completely knocked down by CD59 (966) siRNA.

HUVECs = Human Umbilical Vein Endothelial Cells; GAPDH = glyceraldehyde 3-phosphate dehydrogenase.

**Figure S5. Co-immunoprecipitation of VAMP3 and VAMP8 with CD59.** Western blot probed with antibodies directed against CD59, VAMP3 and VAMP8 in the immunoprecipitates of VAMP3 and VAMP8 of HUVECs exposed to normoxia or IH. IgG served as negative control.

VAMP3 = Vesicle-associated Membrane Protein 3; VAMP8 = Vesicle-associated Membrane Protein 8; HUVECs = Human Umbilical Vein Endothelial Cells.

**Figure S6. Intracellular calcium mediates IH-induced endothelial vWF and Angiopoietin-2 release after complement stimulation.** (A) Representative confocal images of intracellular vWF protein expression in HUVECs after stimulation with recombinant C9 and treatment with BAPTA-AM or vehicle (0.1% DMSO) in normoxia and IH. EC plasma membrane is identified by immunofluorescence for VE-cadherin. (B) Quantitation of intracellular vWF protein expression (fluorescence area in  $\mu\text{m}^2$ ) in HUVECs after stimulation with C9 and treatment with BAPTA-AM ( $n = 5$ ) or vehicle (0.1% DMSO) ( $n = 8$ ) in normoxia and IH. (C) Quantitation of vWF levels in HUVECs culture media after stimulation with C9 and treatment with BAPTA-AM or vehicle (0.1% DMSO) in normoxia and IH ( $n = 6$ ). (D) Representative histogram with a log scale x-axis of vWF fluorescence intensity on the cell surface in HUVECs after stimulation with C9 and treatment with BAPTA-AM or vehicle (0.1% DMSO) in normoxia and IH. (E) Quantitation of vWF expression on the cell surface in HUVECs after stimulation with C9 and treatment with BAPTA-AM or vehicle (0.1% DMSO) in normoxia and IH, expressed as mean fluorescence intensity ( $n = 4$ ). (F) Quantitation of angiopoietin-2 levels in culture media of HUVECs after stimulation with C9 and treatment with BAPTA-AM or

vehicle (0.1% DMSO) in normoxia and IH ( $n = 5$ ). All data throughout the figure are shown as the mean  $\pm$  SE, 2-sided t-test test.

IH = Intermittent Hypoxia; vWF = von Willebrand factor; HUVECs = Human Umbilical Vein Endothelial Cells; BAPTA-AM = 1, 2-bis(2-aminophenoxy)ethane-N,N,N',N'-tetraacetic acid tetrakis (acetoxymethyl ester); DMSO = Dimethyl Sulfoxide; EC = Endothelial Cell; VE = Vascular Endothelial.

**Figure S1**

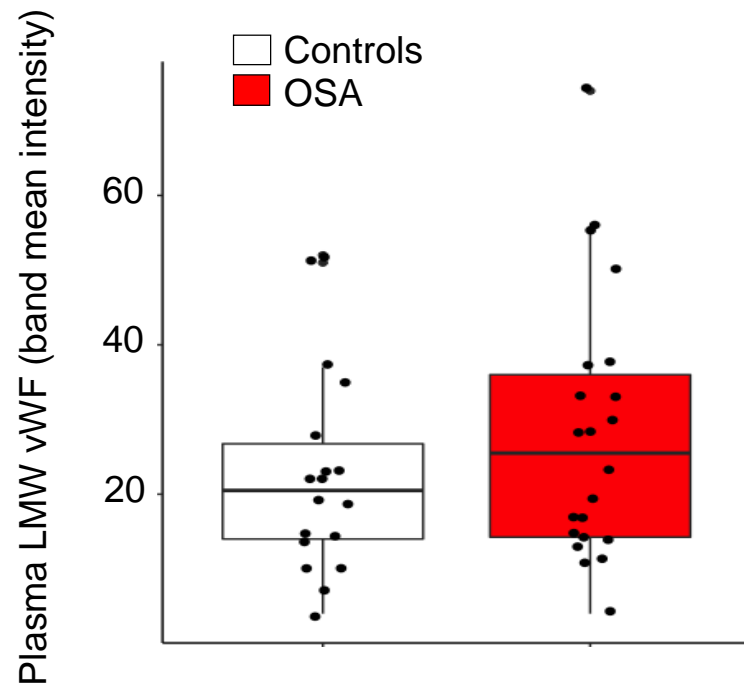

Figure S2

A

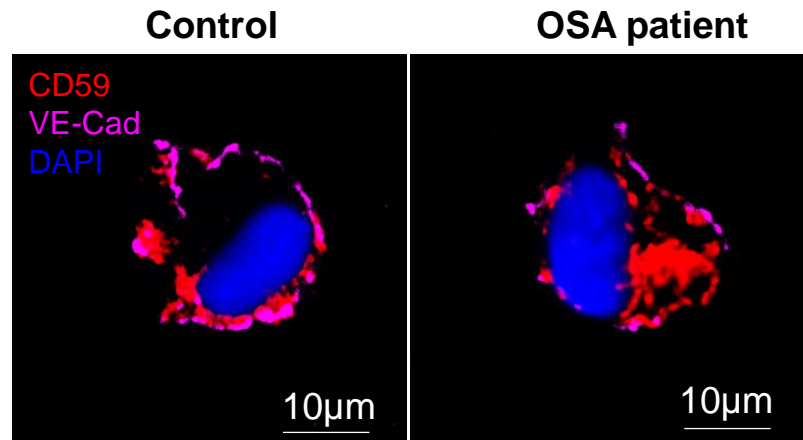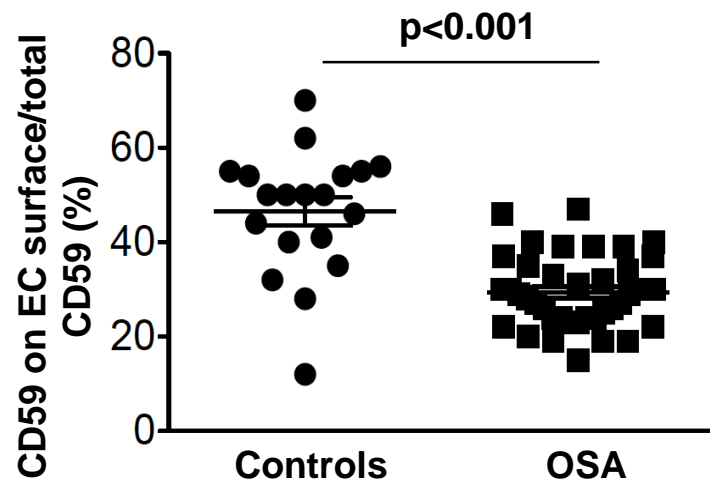

B

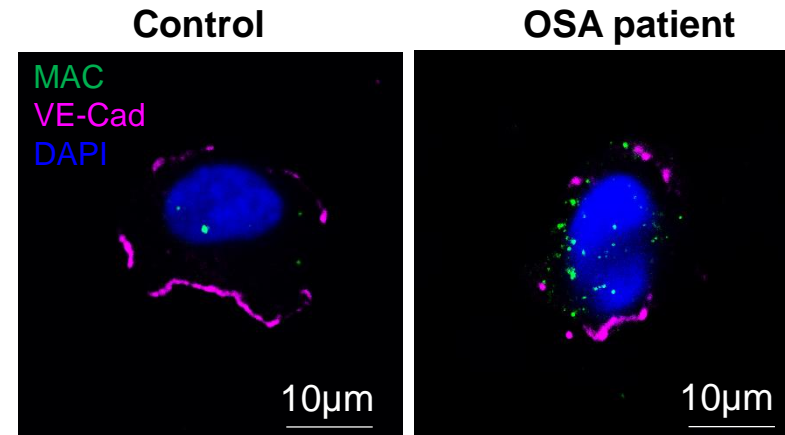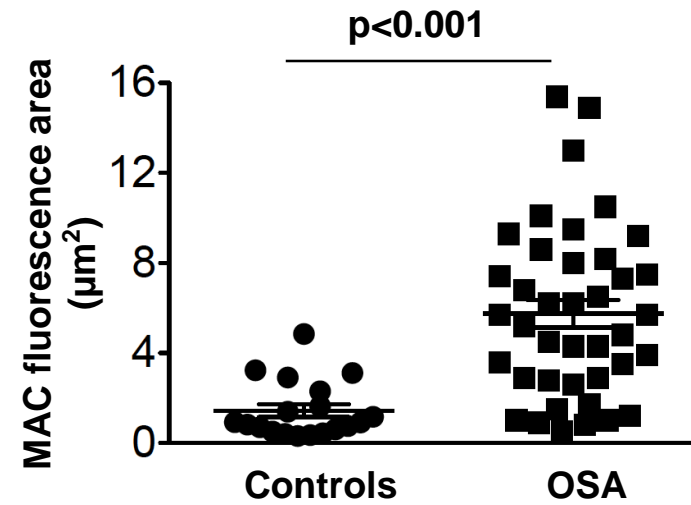

Figure S3

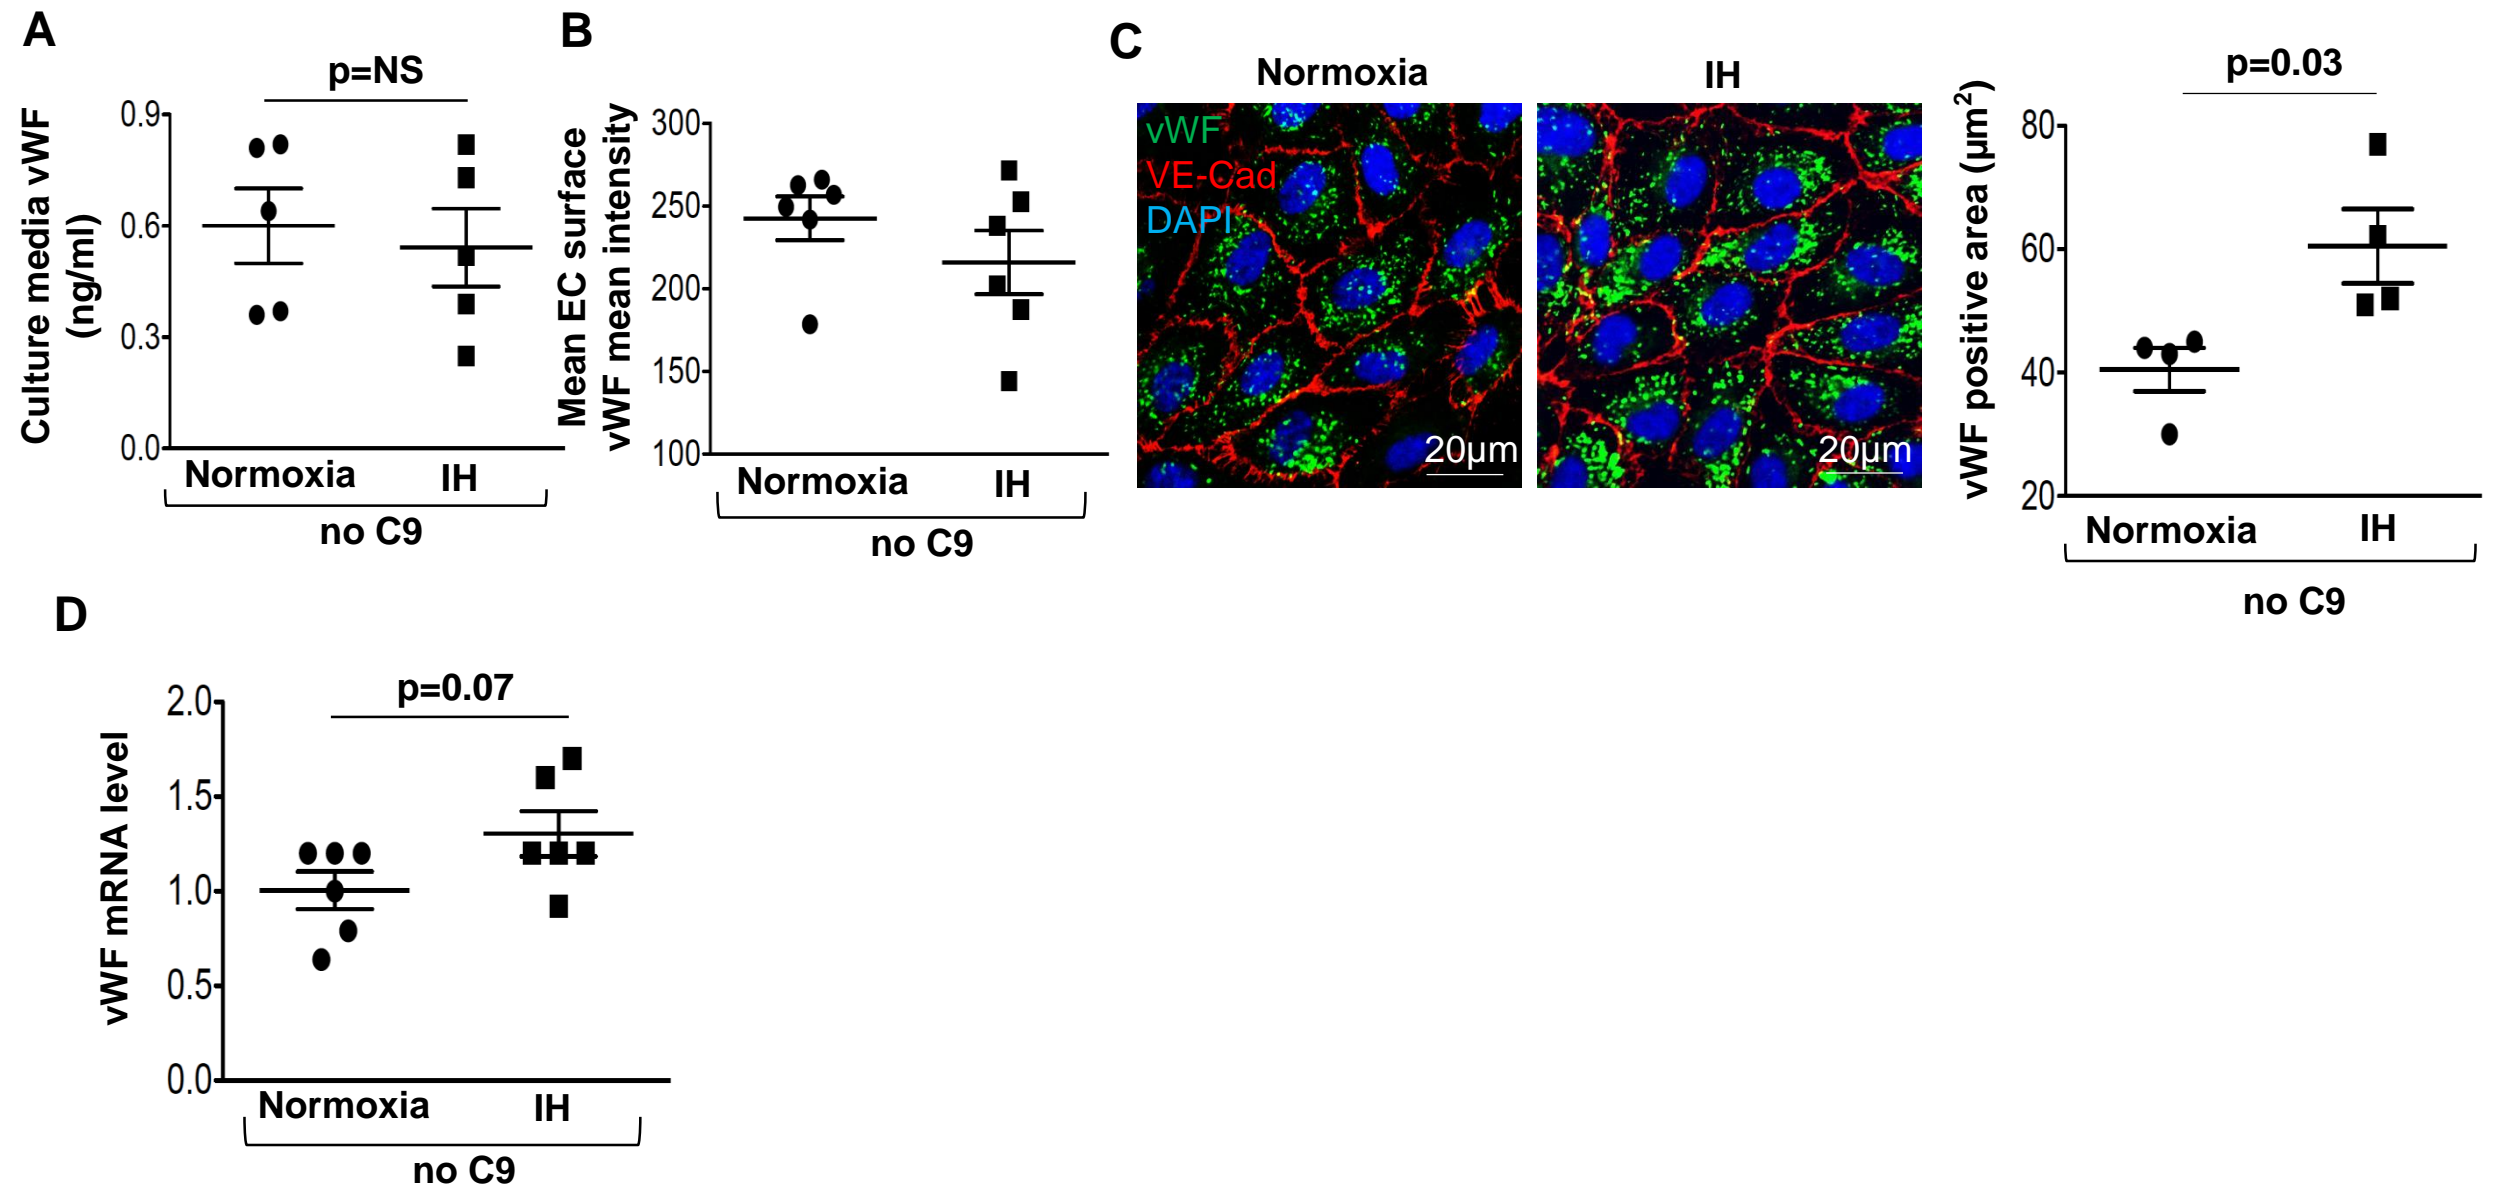

**Figure S4**

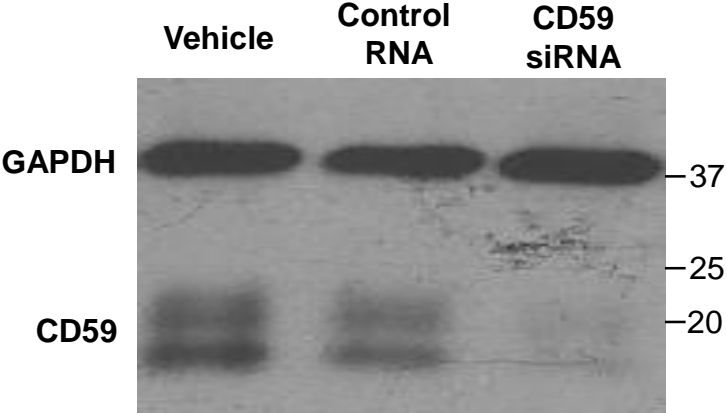



**Figure S5**

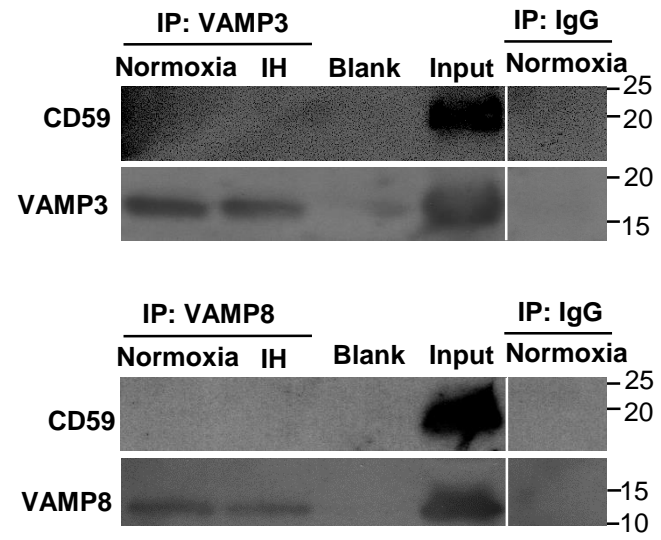

Figure S6

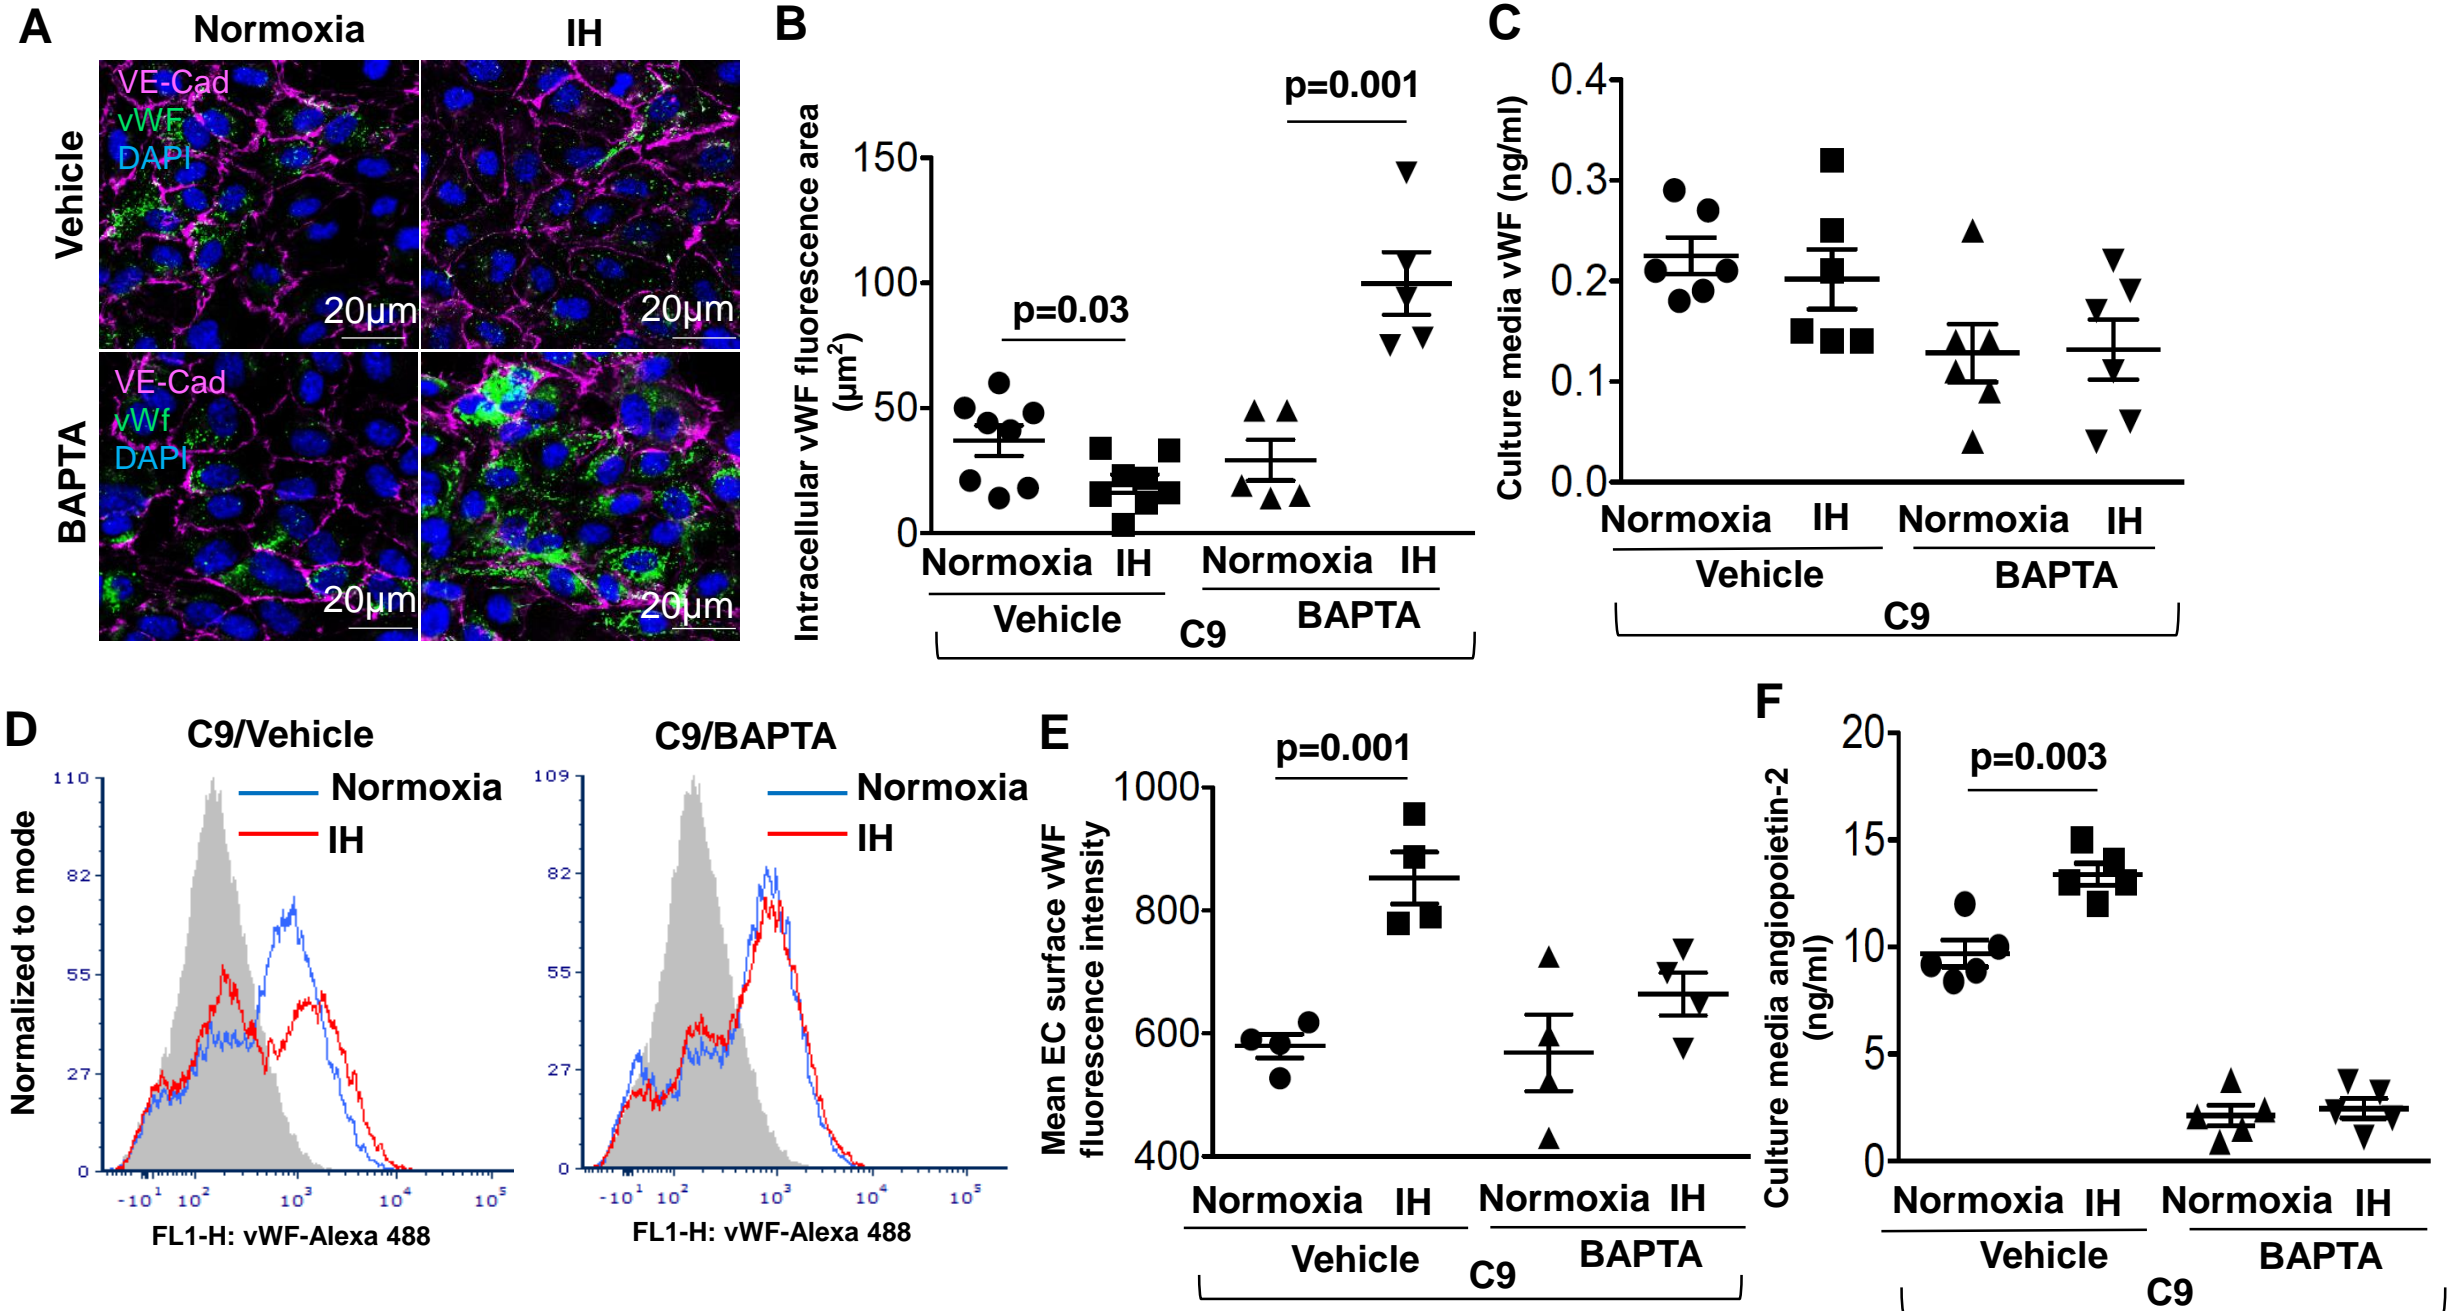

Supplement: zsaa286_suppl_supplemental_materials.pdf [file zsaa286_suppl_supplemental_materials.pdf]
